# Supplementary material for: Circadian Disruption across Lifespan Impairs Glucose Homeostasis and Insulin Sensitivity in Adult Mice
Source: MDPI journal article supplement (doi:10.3390/metabo14020126), 2024-02-16
Supplement: s1 [file s1]

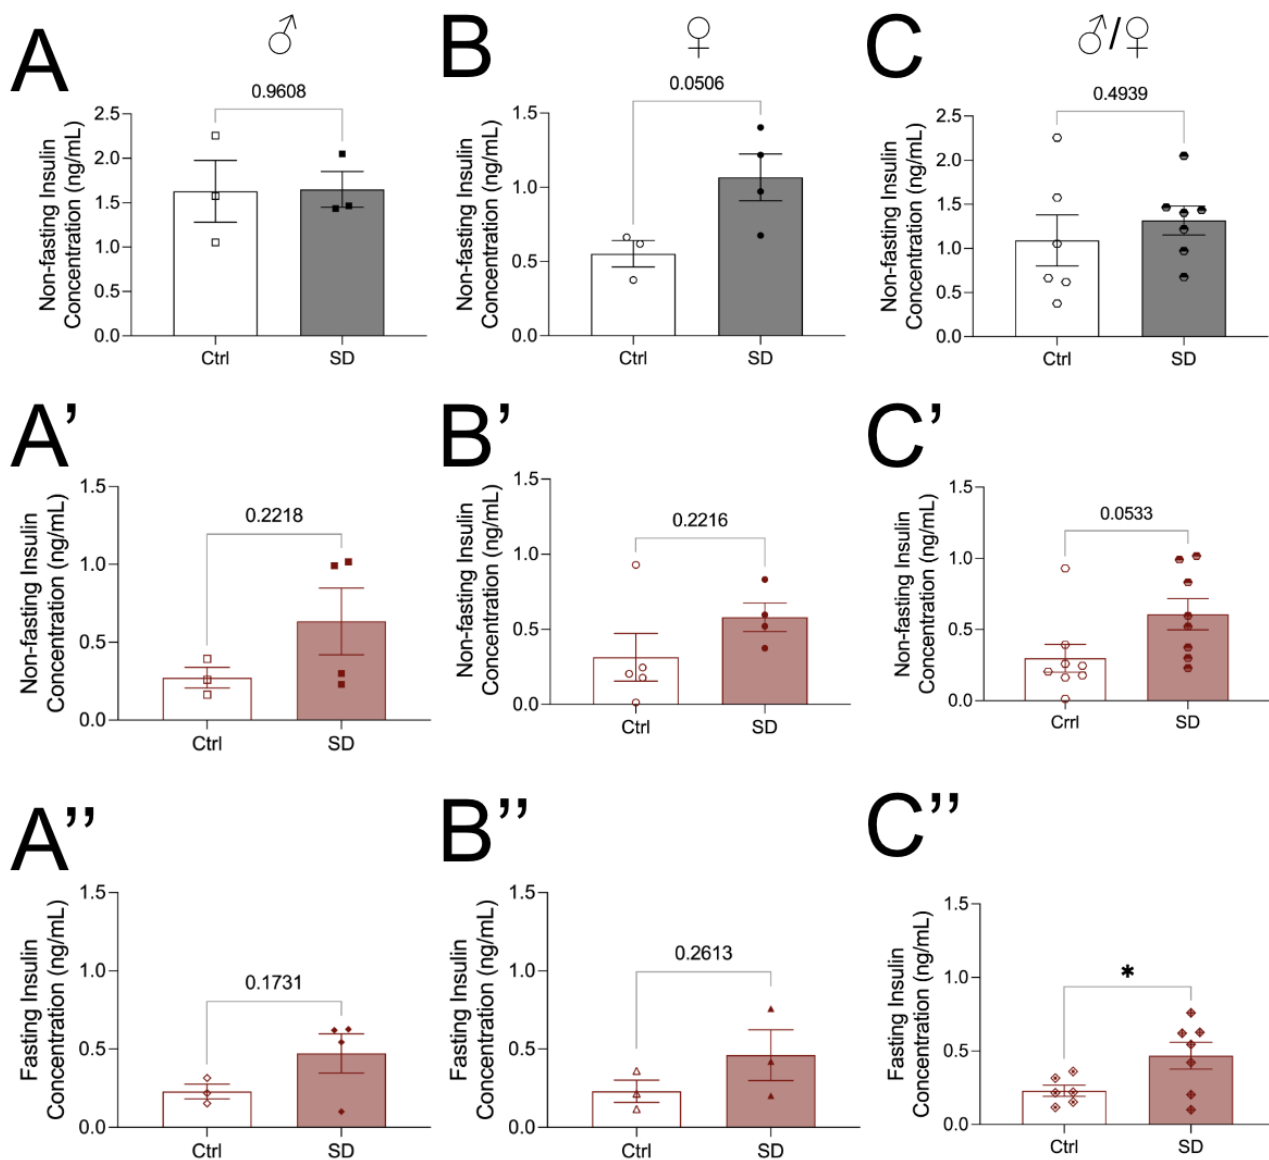

**Figure S1. Non-fasting and fasting insulin concentration of Ctrl and SD mice.** Non-fasting insulin levels of Ctrl (n=3) and SD (n=3-4) male mice in NCD (A). Non-fasting (A') and fasting (A'') insulin levels of Ctrl (n=3) and SD (n=3-4) male mice in HFD. Non-fasting insulin levels of Ctrl (n=3) and SD (n=4) female mice in NCD (B). Non-fasting (B') and fasting (B'') insulin levels of Ctrl (n=3-5) and SD (n=3-4) female mice in HFD. Combined male and female non-fasting insulin concentration under NCD (C). Combined male and female non-fasting (C') and fasting (C'') insulin concentration under HFD. Statistical analysis performed using unpaired, two-tailed, student T-Test. \*P ≤ .05, \*\*\*\*P ≤ .0001.

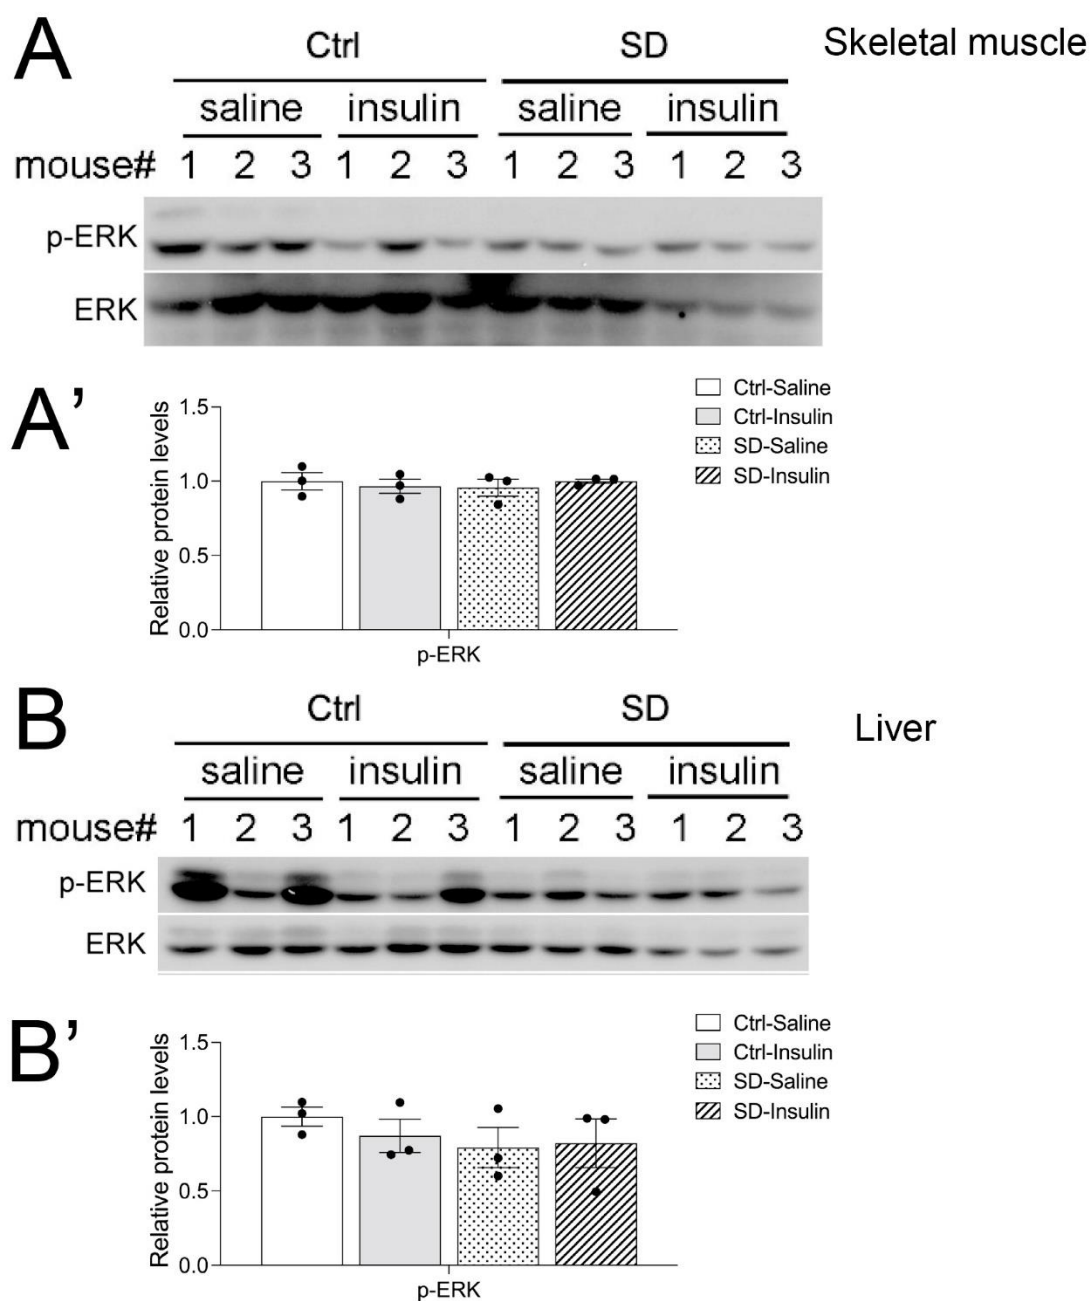

**Figure S2. Western blots of p-ERK and ERK.** Blots from lysates of skeletal muscle (A) with quantification (A') from female SD mice. Tissues were harvested from 8-week-old female SD mice 5 min after *i.p.* administration of 1.0 U/kg insulin. Statistical analysis performed using unpaired, two-tailed, Student's t-test.
